# Supplementary material for: The long noncoding RNA HOTAIR activates autophagy by upregulating ATG3 and ATG7 in hepatocellular carcinoma
Source: Royal Society of Chemistry journal article supplement (doi:10.1039/c6mb00114a), 2016-05-23
Supplement: c6mb00114a1.pdf [file c6mb00114a1.pdf]

## qRT-PCR primers

HOTAIR:

5'-CAGTGGGGAAGTCTGACTCG-3'(forward),

5'-GTGCCTGGTGCTCTTACC-3' (reverse)

Atg3:

5'- ATGGGAGTTGGCGAAGGCAAGT -3' (forward)

5'- AGCTCCACGTATCGAAGACAGC -3' (reverse)

Atg4:

5'- TATTGGTGGCAAACCTAAACAGTC -3' (forward)

5'- TTGGGAGAAGGGCAGTGGAATGA -3' (reverse)

Atg5:

5'- GCAGATGGACAGTTGCACACA -3' (forward)

5'- GAGGTGTTTCCAACATTGGCTCA-3' (reverse)

Atg7:

5'- CGTTGCCACAGCATCATCTTC -3' (forward)

5'- CACTGAGGTTACCATCCTTGG-3' (reverse)

Atg8:

5'- CAGAACTGCTGGTGAGGACACT -3' (forward)

5'- AGCAGGCTGATAGGAAAGGCGA-3' (reverse)

Atg9:

5'- GCTTCCTCAAGGAGCAGGTTCA -3' (forward)

5'- CCACATTTGCGATAAGGCTCAGG-3' (reverse)

Atg10:

5'-CTACGGAAGAGAACCAGGAGCT -3' (forward)

5'- CTGGTAGAGGTTCCCTTTGCTGC-3' (reverse)

Atg12:

5'-GGGAAGGACTTACGGATGTCTC -3' (forward)

5'- AGGAGTGTCTCCCACAGCCTTT-3' (reverse)

LC3B:

5'-CTGAGATTGGTGTGGAGACG-3' (forward)

5'- CGGTGATAATAGAACGATACAAGG -3' (reverse)

18S:

5'-ACCCGTTGAACCCCATTCGTGA-3' (forward)

5'-GCCTCACTAAACCATCCAATCGG-3' (reverse)

siRNA for HOTAIR:

target sequence: siRNA, 5'-AAAUCCAGAACCCUCUGACAUUUGC-3'
